# Supplementary material
Source: PubMed Central journal article supplement (PMC2556893)
Supplement: NIHMS60695-supplement-supplement_1.pdf [file NIHMS60695-supplement-supplement_1.pdf]

## Dynamics of CD80 in the T cell-dendritic cell synapse

### Online Supplemental Material

#### **Supplemental Movie 1.** OT-II T cell and DC interaction.

OT-II Tg CD4<sup>+</sup> T cells were added to overnight LPS/ $\alpha$ CD40 matured CD11c<sup>+</sup> CD80-eCFP splenic DC pulsed with 5  $\mu$ M OVA. TCR was labeled with H57 Fab. This is an 11 min movie. CD80 is shown in green and TCR in red.

**Supplemental qtvr 1.** 3D view of T cell-DC IS corresponding to Figure 4A. anti-CD80 is shown in green, anti-TCR in red, and anti-LFA-1 in blue. The interface is demarcated by the numerous CD80 clusters interspersed with a few small TCR clusters. Some larger TCR clusters appear to be in invaginations to the side of the IS.

**Supplemental qtvr 2.** 3D view of T cell-DC IS corresponding to Figure 4B. CD80-eCFP is shown in green, anti-TCR in red, and anti-LFA-1 in blue. The T cell is interacting with a process from the DC and the DC body through a dense network of LFA-1 clusters interspersed with CD80-eCFP and TCR clusters.

**Supplemental qtvr 3.** 3D view of T cell-DC IS corresponding to Figure 6B 90s. CD80-eCFP is shown in green and anti-TCR Fab in red.

**Supplemental qtvr 4.** 3D view of T cell-DC IS corresponding to Figure 6B 210s. CD80-eCFP is shown in green and anti-TCR Fab in red. Comparison of qtvr 3 and 4 show how a TCR cluster appears to emerge in area that had previously been dominated by CD80 clusters.
